# Supplementary material for: USP11-mediated LSH deubiquitination inhibits ferroptosis in colorectal cancer through epigenetic activation of CYP24A1
Source: PubMed Central journal article supplement (PMC10326026; doi:10.1038/s41419-023-05915-9), 2023-07-06

**1B**

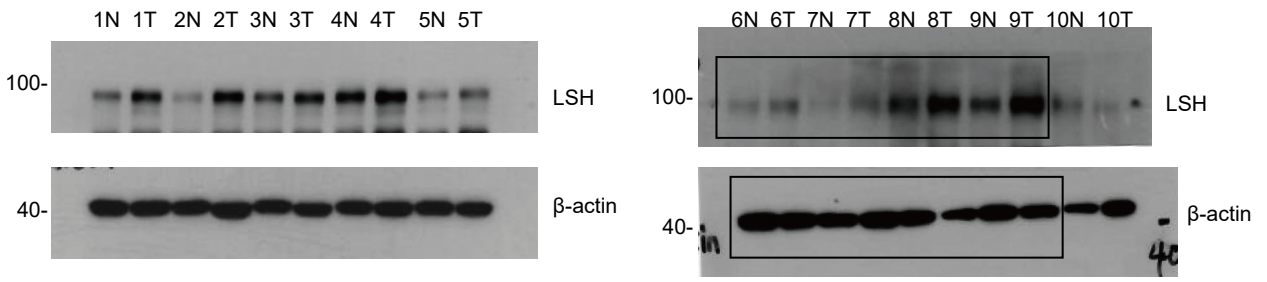

**1E**

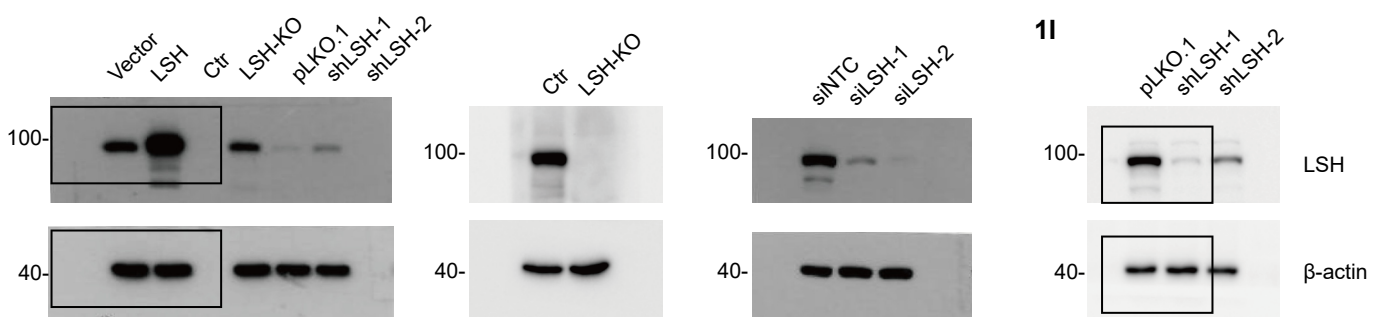

**1I**

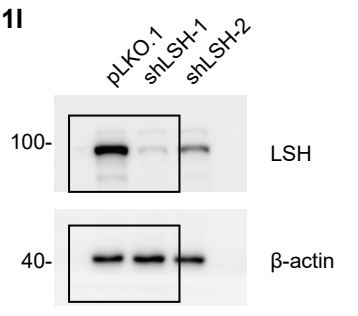

**2A**

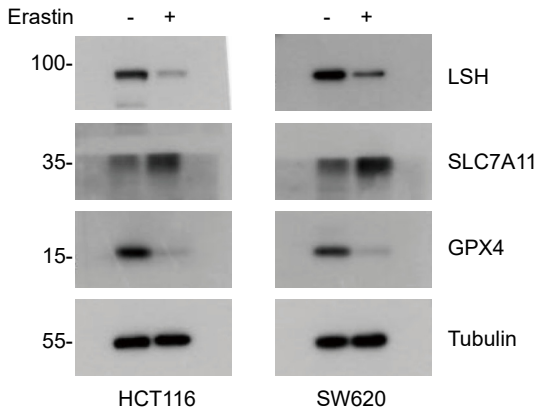

**2B**

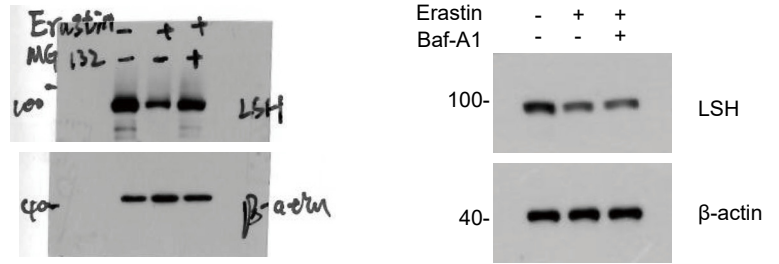

**2C**

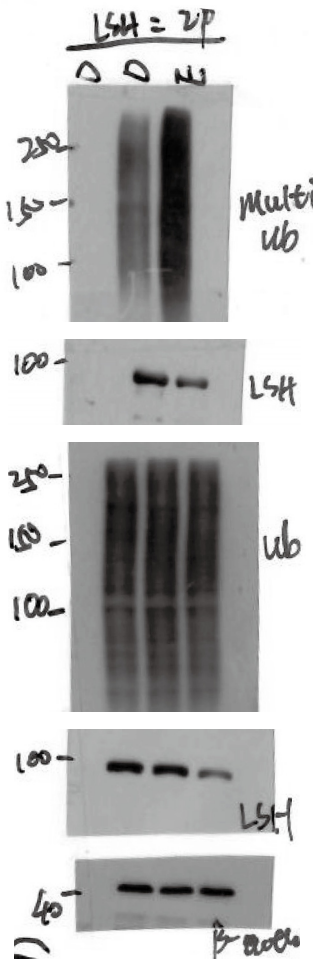

**2D**

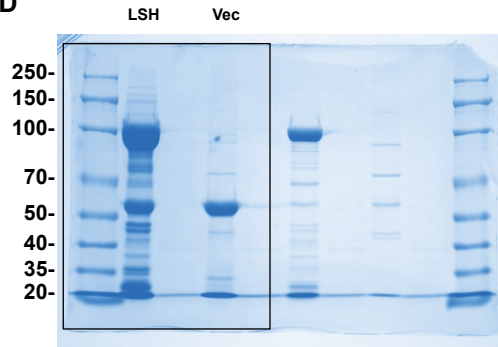

**2E**

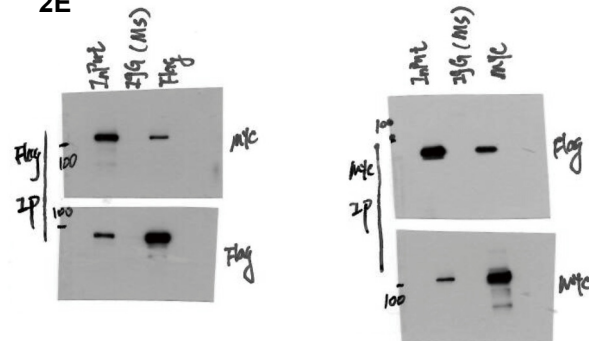

**2F**

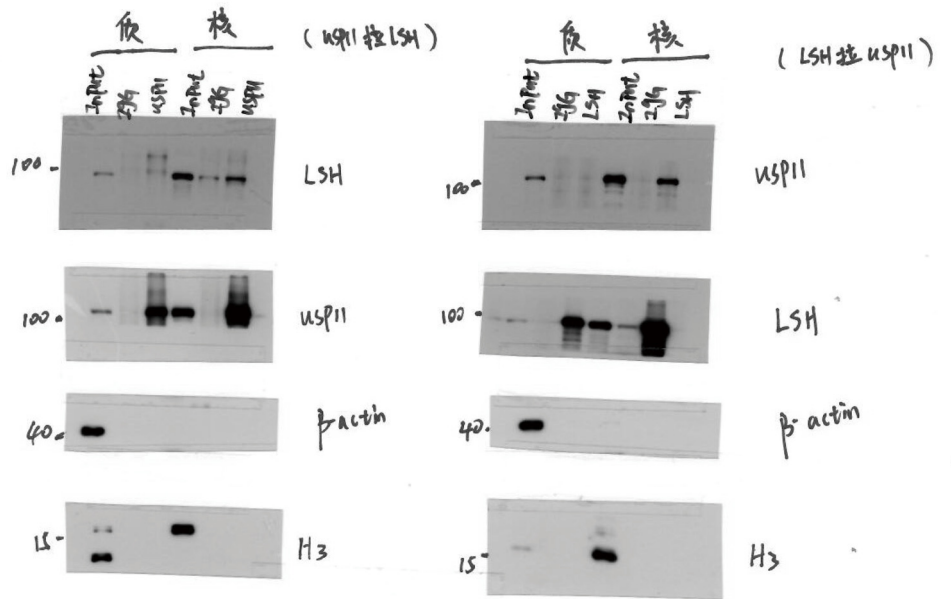

**2H**

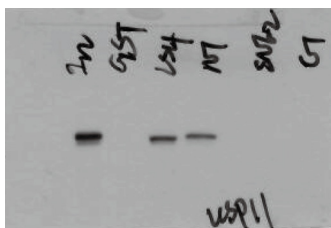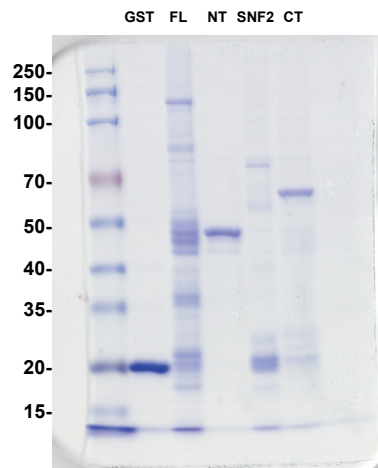

**3A**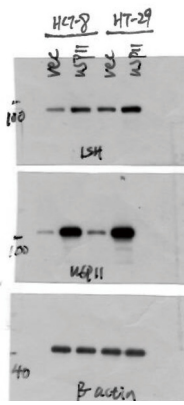**3B**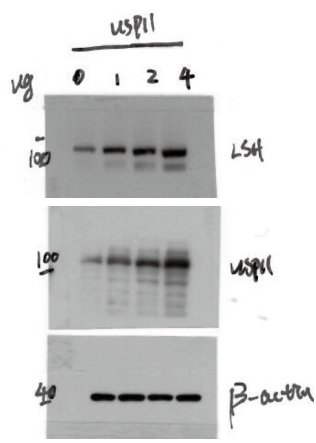**3C**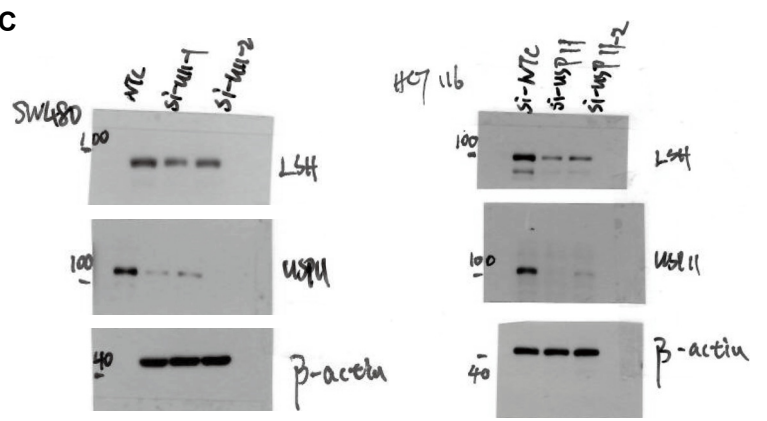**3D & 3E**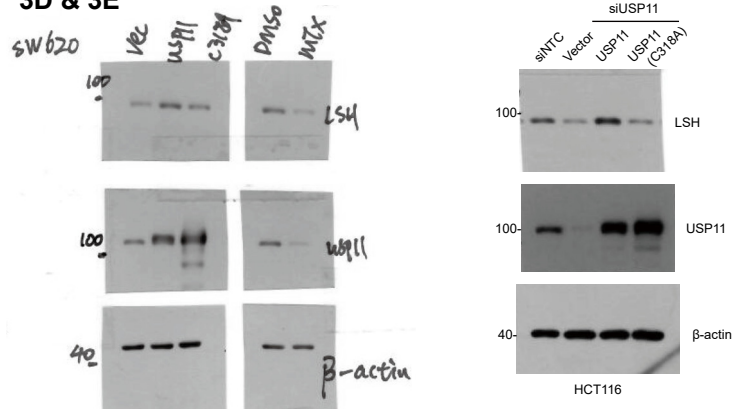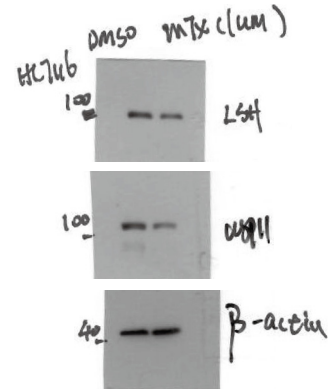**3F**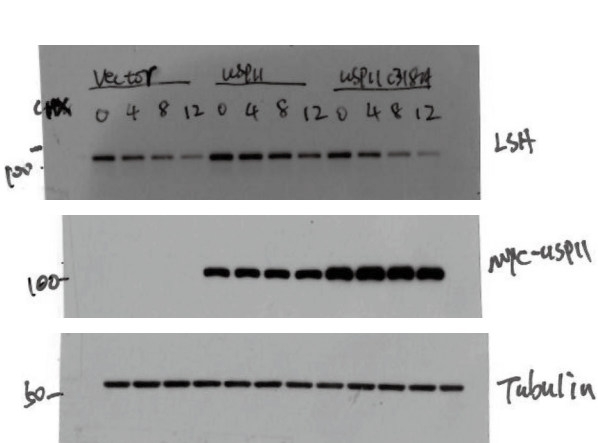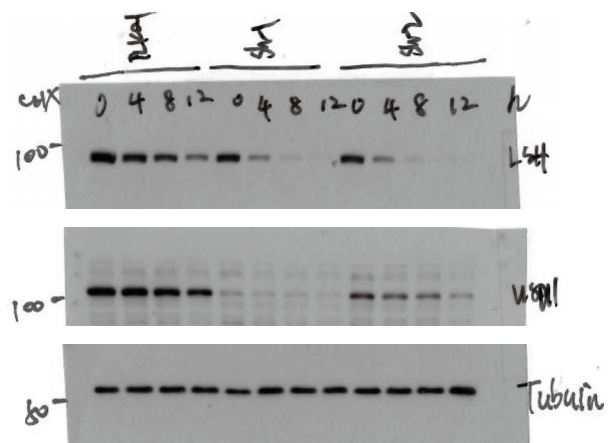**3G**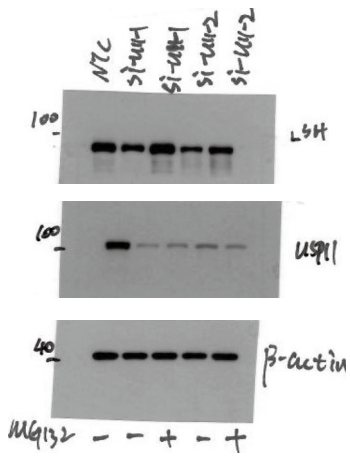

3H

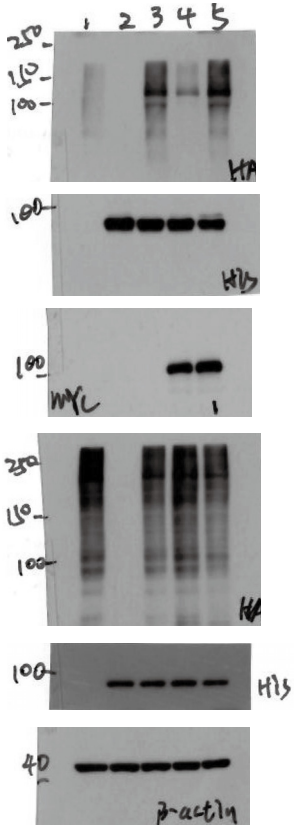

3I

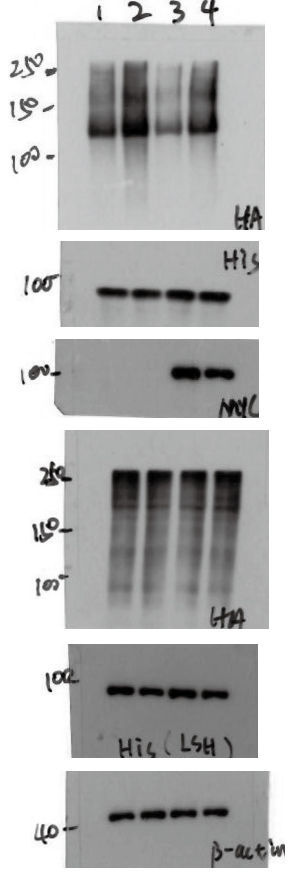

3J

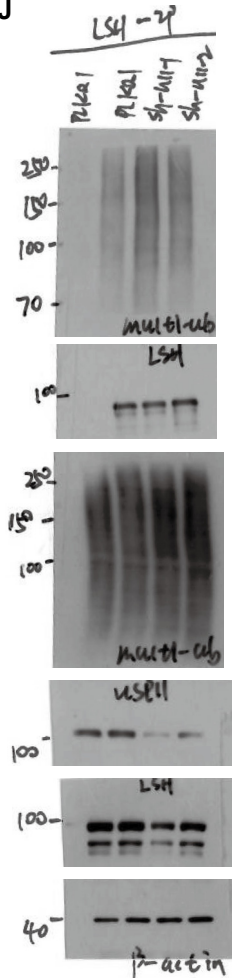

3K

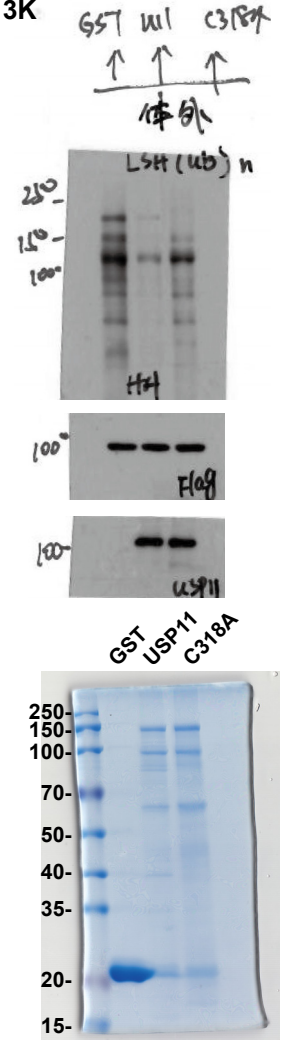

3L

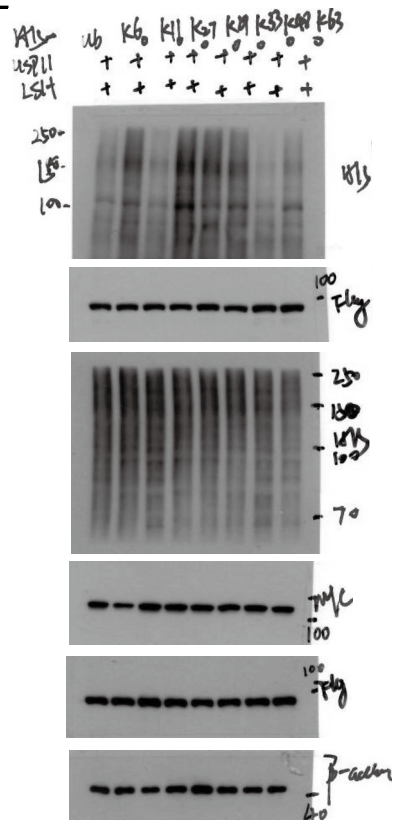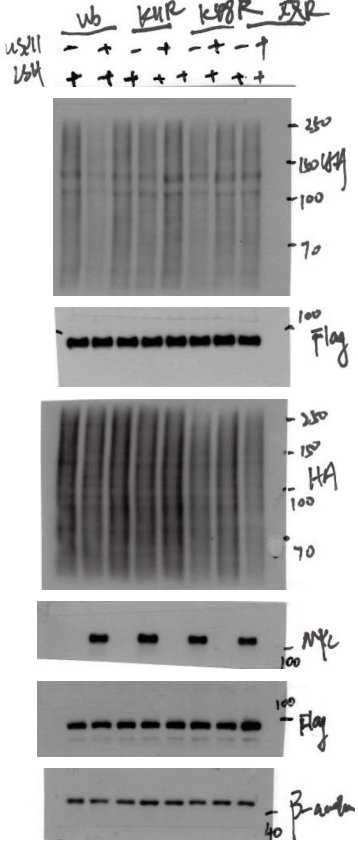

3M

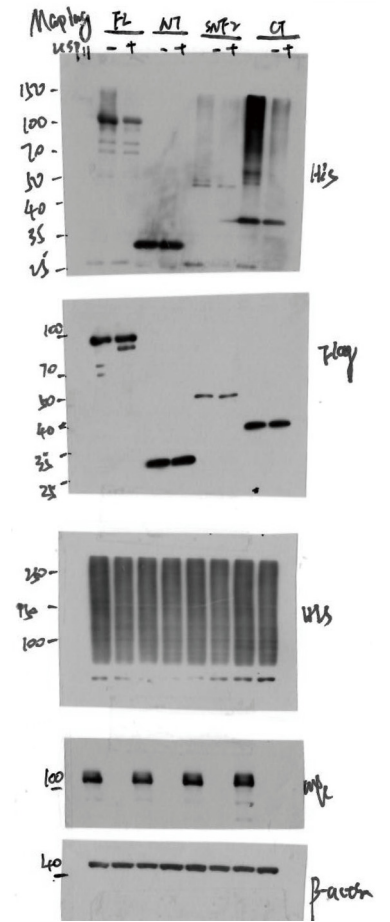

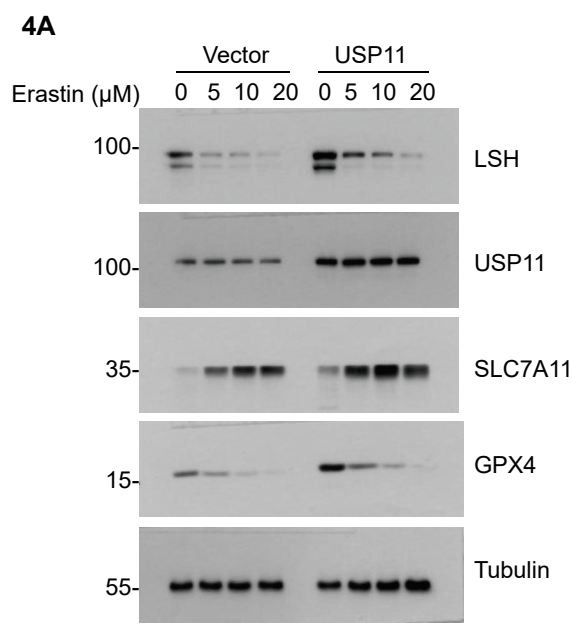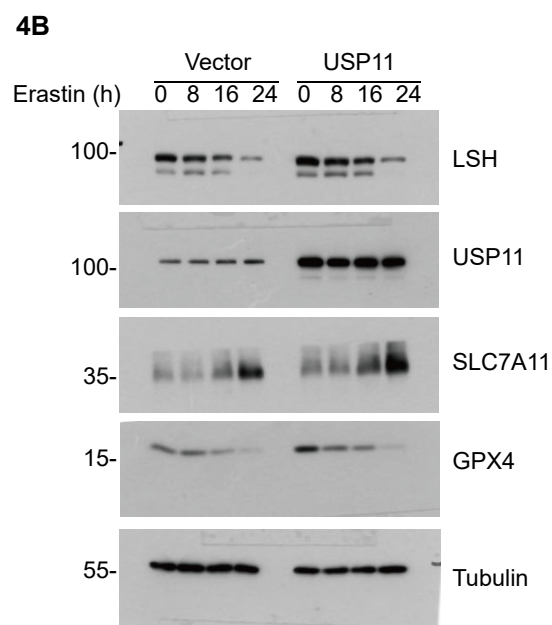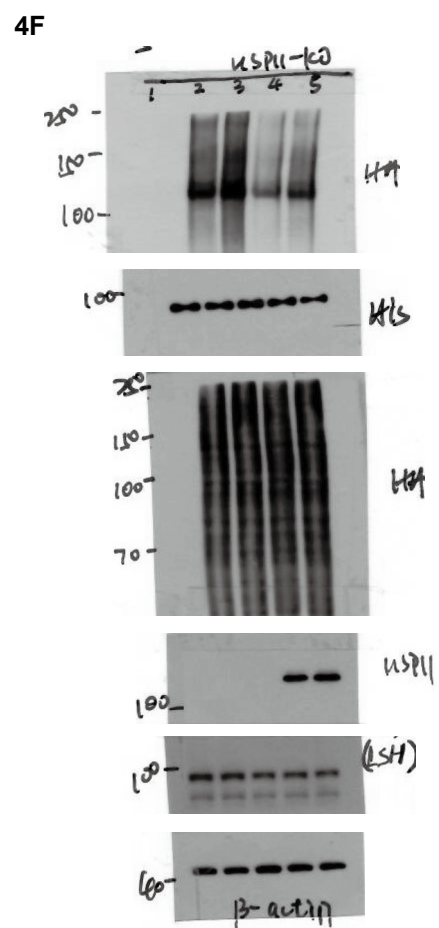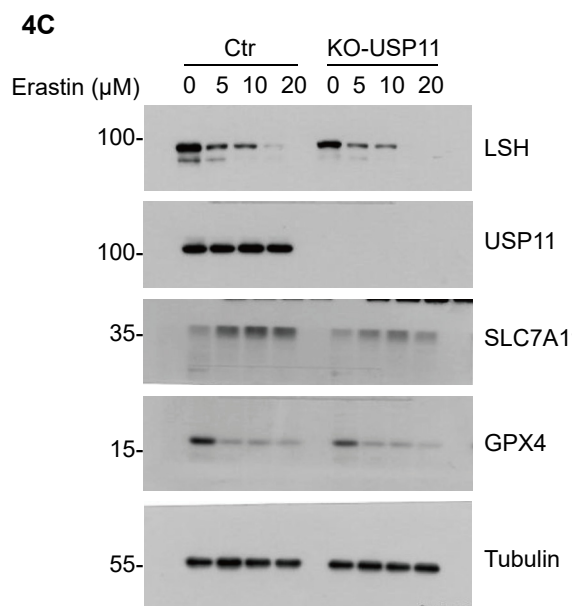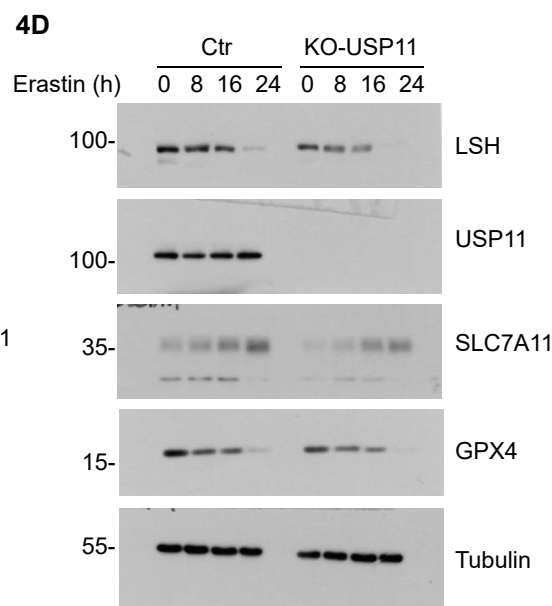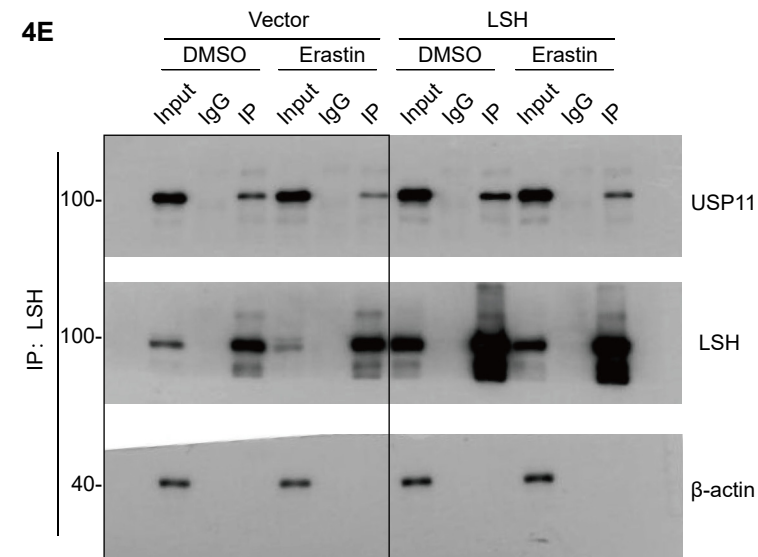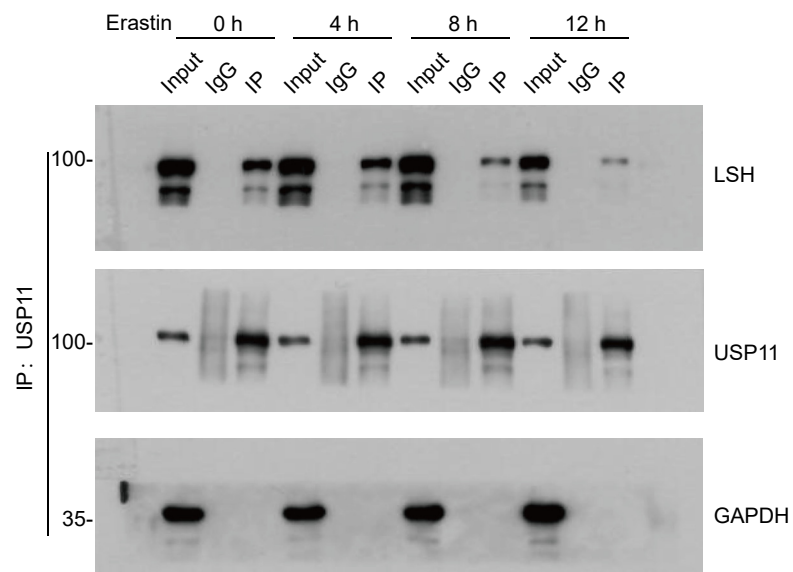

5F

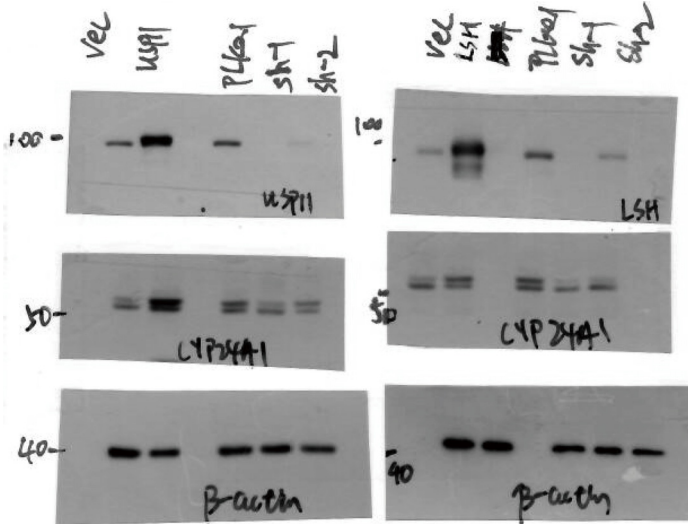

5G

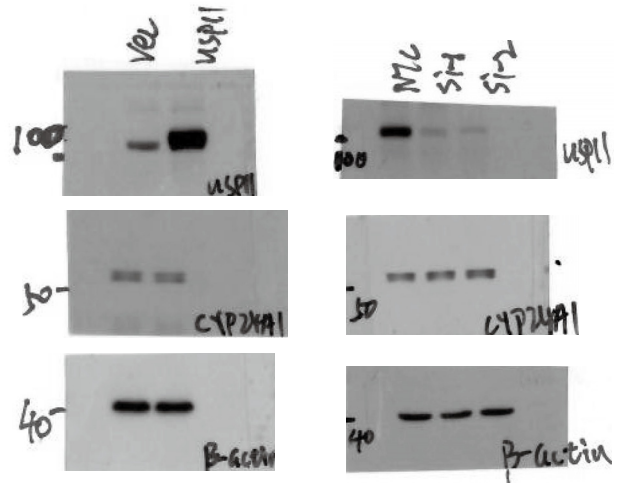

5H

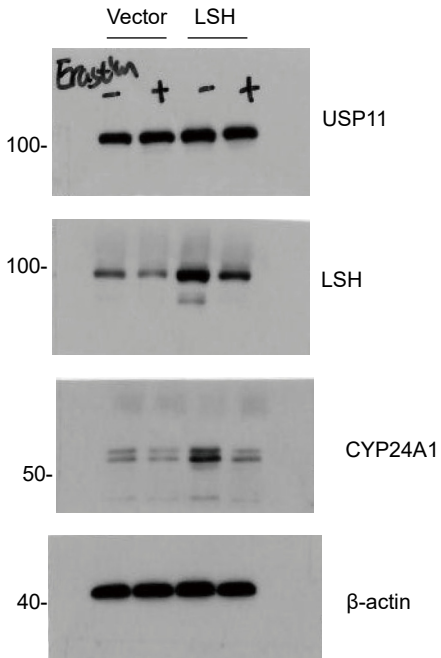

5I

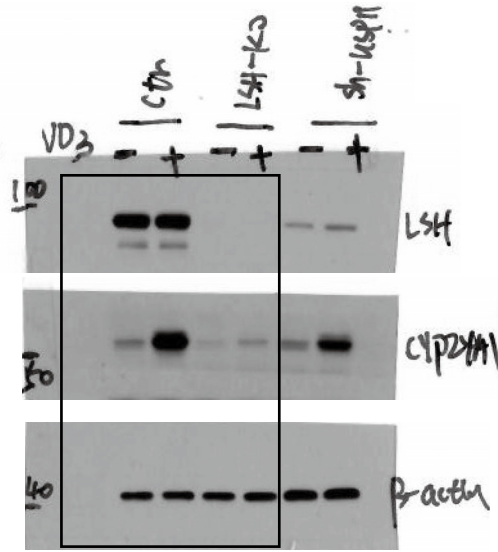

**6C**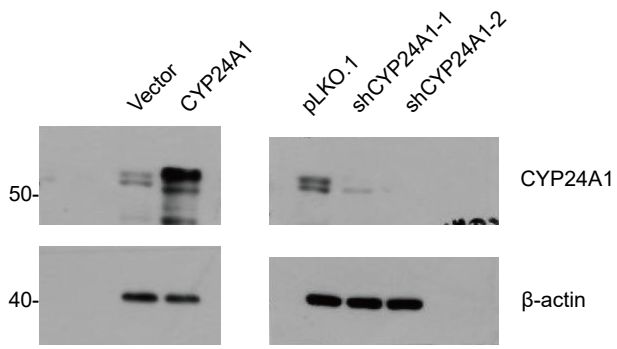**7D**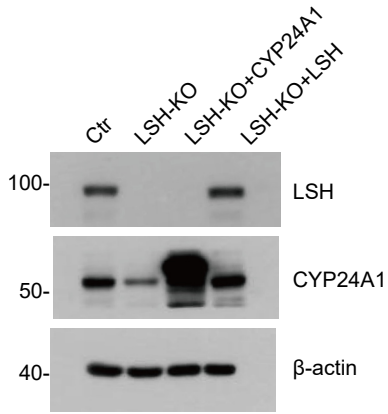**6M**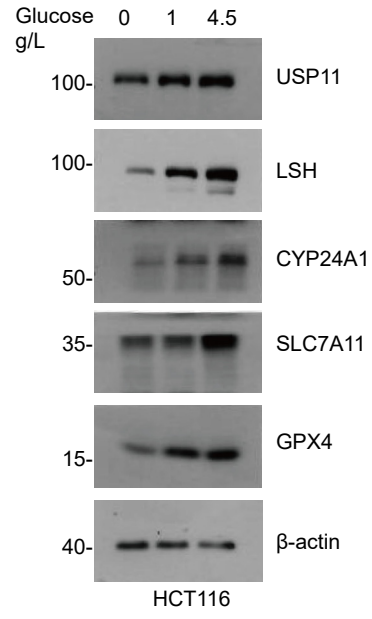

S1A

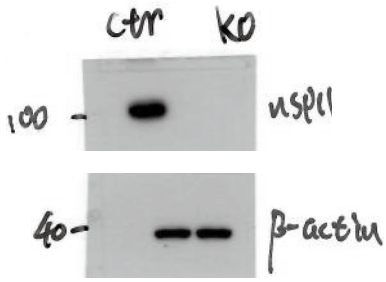

S1B

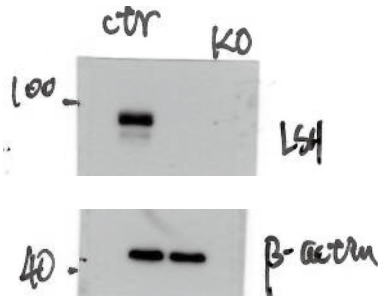

S1C

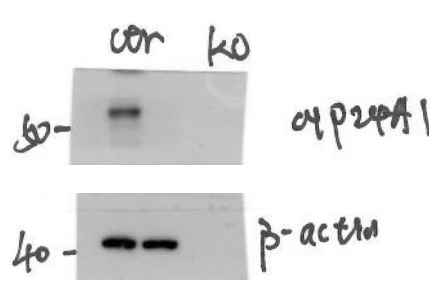

S2B

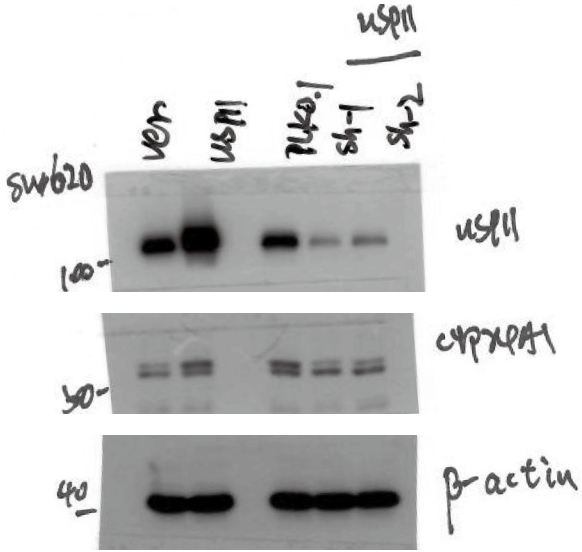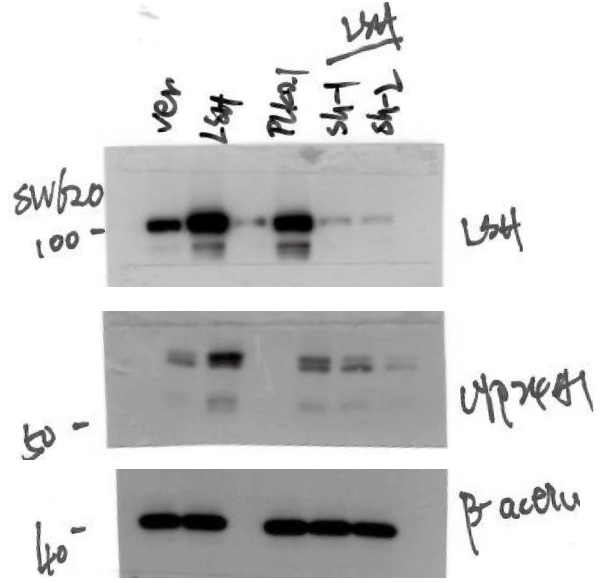

S2C

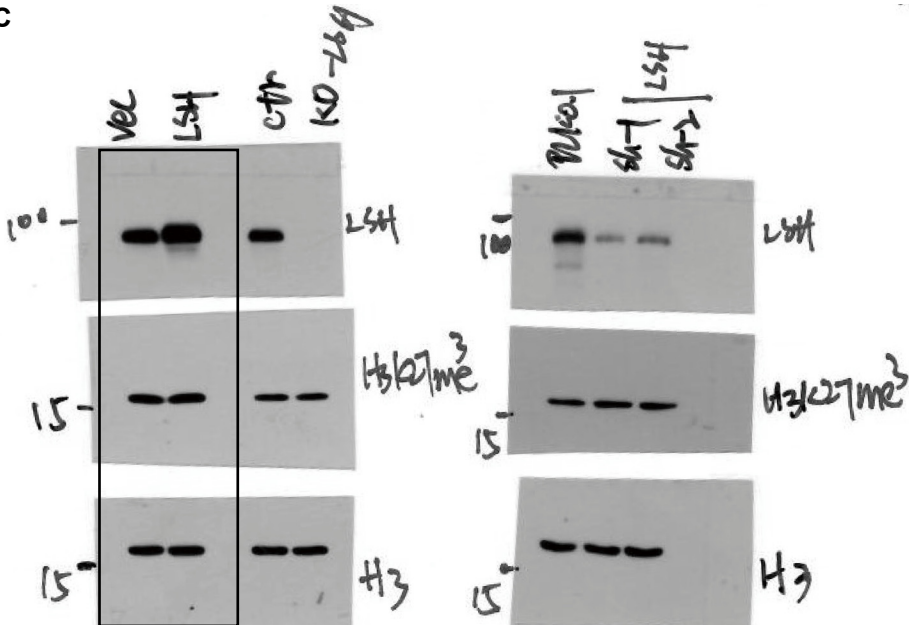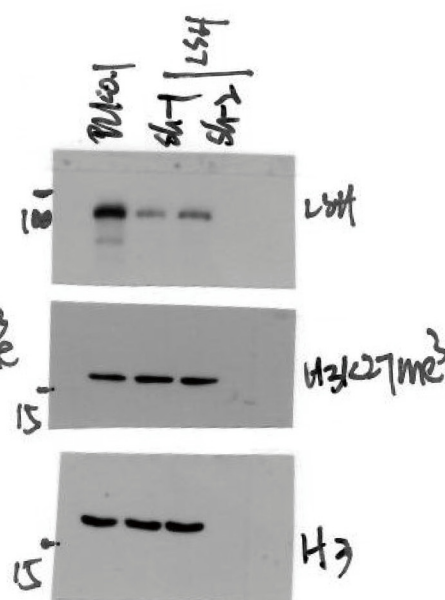

Supplement: 41419_2023_5915_MOESM4_ESM.pdf [file 41419_2023_5915_MOESM4_ESM.pdf]
